# Supplementary material for: Genome-wide association mapping of resistance to Phytophthora sojae in a soybean [Glycine max (L.) Merr.] germplasm panel from maturity groups IV and V
Source: PLoS One. 2017 Sep 14;12(9):e0184613. doi: 10.1371/journal.pone.0184613 (PMC5599008; doi:10.1371/journal.pone.0184613)
Supplement: S3 Table — (XLSX) [file pone.0184613.s003.xlsx]

## Sheet: Sheet1
Supplementary Table 3. Resistance-associated regions for P. sojae resistance in the panel of 97 soybean accessions resistant to one or more races.
Accession	Phenotype for Race 1	Significant region for race 1	phenotype for race 3	Significant region for race 3	Phenotype for race 7	Significant region for race 7	Phenotype for race 17	Significant region for race 17	Phenotype for race 25	Significant region for race 25
PI103079	R	sr13-race1,sr5-race1
PI123587	R	sr13-race1,sr5-race1
PI253651B	R	sr13-race1	R	sr7-race3
PI253652B	R	sr13-race1,sr3-race1&7	R
PI253654	R	sr18-race1,,sr5-race1,sr3-race1&7	R	sr7-race3
PI253656B	R	sr13-race1,sr5-race1	R	sr7-race3
PI266807D	R	sr13-race1,sr5-race1	R	sr7-race3
PI304218	R	sr3-race1&7	R	sr7-race3	R	sr3-race1&7	S		R	sr10-race25,sr14-race25,sr18-race25
PI377574	R	sr18-race1,sr13-race1,sr5-race1,sr3-race1&7	S
PI378682C	R	sr13-race1,sr5-race1	R	sr7-race3	R	sr4-race7,sr3-race7,sr13-race7	R	sr3a-race17,sr3b-race17	R	sr10-race25,sr14-race25,sr18-race25
PI398338	R	sr13-race1,sr5-race1,sr3-race1&7
PI398633	R	sr13-race1,sr5-race1
PI399058	R	sr13-race1,sr5-race1
PI399064	R	sr13-race1,sr5-race1,sr3-race1&7
PI404163	R	sr5-race1			S		R	sr3a-race17,sr3b-race17	R	sr10-race25,sr18-race25
PI404197	R	sr18-race1			S		S		S
PI407778A	R	sr5-race1,sr3-race1&7			R	sr3-race1&7,sr4-race7	R	sr3b-race17	R	sr10-race25,sr14-race25,sr18-race25
PI408076C	R	sr18-race1,sr13-race1,sr5-race1,sr3-race1&7
PI408080	R	sr18-race1,sr13-race1,sr5-race1
PI408113	R	sr5-race1
PI416827	R	sr18-race1,,sr5-race1,sr3-race1&7
PI417092	R	sr5-race1,sr3-race1&7			R	sr3-race1&7,sr3-race7	S		S
PI417103	R	sr18-race1,sr13-race1
PI417380	R	sr13-race1,sr3-race1&7			R	sr3-race1&7,sr3-race7,sr13-race7	R	sr3a-race17,sr3b-race17	S
PI417567	R	sr18-race1,sr3-race1&7
PI424137B	R	sr18-race1,sr13-race1,sr5-race1
PI437586C	R	sr18-race1,sr5-race1
PI506639	R	sr13-race1,sr5-race1
PI507420	R	sr5-race1
PI533605	R	sr13-race1,sr5-race1
PI548337	R	sr18-race1,sr13-race1,sr5-race1	S		S
PI548546	R	sr13-race1,sr5-race1	S		S
PI567316A	R	sr18-race1,sr5-race1	R	sr7-race3
PI567319A	R	sr18-race1,sr13-race1,sr5-race1,sr3-race1&7	R	sr7-race3	R	sr3-race1&7	R	sr3a-race17,sr3b-race17	S
PI567325B	R	sr18-race1,sr13-race1,sr5-race1	S
PI567343	R	sr13-race1,sr5-race1	R	sr7-race3
PI567347	S		R	sr7-race3
PI567370B	R	sr5-race1	R	sr7-race3
PI567374	R	sr13-race1,sr5-race1,sr3-race1&7	R	sr7-race3	R	sr3-race1&7	R	sr3b-race17	S
PI567379C	R	sr13-race1	R	sr7-race3
PI567389B	R		R	sr7-race3
PI567395	R	sr13-race1,sr5-race1	R	sr7-race3	S		S
PI567408	R	sr5-race1	R	sr7-race3
PI567424B	S		S		S		S		R
PI567442	S		S		S		R	sr3b-race17	S
PI567455	R	sr5-race1	R	sr7-race3
PI567464	R	sr5-race1,sr3-race1&7	R	sr7-race3	R	sr3-race1&7,sr3-race7	S		S
PI567488A	R	sr13-race1	R	sr7-race3			S
PI567489A	R	sr13-race1	S				S		S
PI567540A	R	sr18-race1,sr13-race1,sr5-race1	R	sr7-race3			S		S
PI567552	R	sr5-race1	S		S		S		S
PI567562A	R	sr5-race1	R		S		S		S
PI567583C	R	sr13-race1,sr5-race1	R		S		S		S
PI567602D	S		S		R	sr3-race1&7	R	sr3a-race17,sr3b-race17	S
PI567632B	S		S		R	sr3-race7			R
PI567633	R	sr13-race1,sr5-race1	R	sr7-race3	R		S		R	sr14-race25
PI567635	R	sr5-race1	R	sr7-race3
PI567659	R	sr13-race1	R	sr7-race3			S		S
PI567675	R	sr13-race1	R	sr7-race3	R	sr4-race7,sr3-race7	R
PI567685	R	sr13-race1	S				S		S
PI567696B	R	sr13-race1,sr5-race1	R	sr7-race3	S		S		R
PI567698A	R	sr3-race1&7	S				R	sr3a-race17	S
PI567733	R	sr13-race1,sr5-race1,sr3-race1&7	S		S		R	sr3a-race17	S
PI567749B	R	sr13-race1,sr5-race1	R				S		S
PI567751A	R	sr13-race1,sr5-race1	R	sr7-race3	S		S		S
PI567755A	R	sr13-race1,sr5-race1	S		S		S		S
PI567770C	R	sr5-race1	R	sr7-race3			R
PI567780B	R	sr3-race1&7	R	sr7-race3	R	sr3-race1&7	R	sr3a-race17	R	sr14-race25
PI567781	R	sr3-race1&7	R	sr7-race3	R	sr3-race1&7	R	sr3a-race17	R	sr14-race25
PI587575A	R	sr18-race1,sr13-race1,sr5-race1	R	sr7-race3	S		R	sr3a-race17,sr3b-race17	S
PI587577G	R	sr13-race1,sr5-race1,sr3-race1&7			S		S		R	sr14-race25
PI587588A	R	sr18-race1,sr3-race1&7			S		R	sr3a-race17	S
PI587588B	R	sr18-race1,sr13-race1,,	S		S		S
PI587612A	R	sr18-race1,sr5-race1	R	sr7-race3	R	sr4-race7	R	sr3a-race17,sr3b-race17	R
PI587674B	S				S		R	sr3a-race17,sr3b-race17	S
PI587772	R	sr5-race1	R	sr7-race3	R	sr4-race7	R	sr3b-race17	S
PI587788A	R	sr13-race1,sr5-race1	R	sr7-race3	R	sr4-race7	R	sr3b-race17	S
PI587820B	S		S		S		R	sr3a-race17,sr3b-race17	S
PI587846A	R		S		S		S		S
PI588011A	R	sr13-race1	S		S		R	sr3b-race17	S
PI588015B	S		S		S		R	sr3a-race17,sr3b-race17	S
PI588021A	R	sr3-race1&7	R	sr7-race3	R	sr3-race1&7	R	sr3b-race17	R	sr18-race25
PI588028	S		S		S		R	sr3b-race17
PI594398B	R	sr13-race1,sr5-race1	R	sr7-race3	S				R	sr14-race25
PI594409A	R	sr13-race1,sr5-race1	R	sr7-race3					R
PI594471B	S		R	sr7-race3	R	sr4-race7
PI594496	S								R	sr18-race25
PI594579	R	sr18-race1,,sr5-race1	R	sr7-race3	R	sr4-race7			R	sr10-race25,sr14-race25
PI594660A	R	sr13-race1,sr5-race1,sr3-race1&7	R	sr7-race3	R	sr3-race1&7,sr4-race7,sr3-race7
PI594660C	R		R		R
PI594781	S		R						R	sr10-race25
PI594847	R	sr13-race1,sr5-race1	R	sr7-race3
PI594854	S		S		R	sr4-race7,sr13-race7			S
PI594873	S		R	sr7-race3	R	sr4-race7,sr3-race7			R	sr18-race25
PI594875A	S		S		R	sr3-race7,sr13-race7
PI594880	S		S		R	sr4-race7
PI594889	R	sr5-race1	R	sr7-race3	R	sr4-race7			R	sr18-race25
